# Supplementary material
Source: publisher figshare collection journal article supplement (https://acs.figshare.com/ndownloader/files/14886656)
Supplement: Supplementary file 1 [file 14886656]

Compound_ID	SMILES
9a	NC1=C2C(N(CCN3CCOCC3)C=C2C4=CC=C(NC(NC5=NOC(C(C)(C)C)=C5)=O)C=C4)=NC=N1
9b	NC1=C2C(NC=C2C3=CC=C(NC(NC4=NOC(C(C)(C)C)=C4)=O)C=C3)=NC=N1
9c	NC1=C2C(N(C(OC(C)(C)C)=O)C=C2C3=CC=C(NC(NC4=NOC(C(C)(C)C)=C4)=O)C=C3)=NC=N1
9d	NC1=C2C(N(CCN3CCN(C(OC(C)(C)C)=O)CC3)C=C2C4=CC=C(NC(NC5=NOC(C(C)(C)C)=C5)=O)C=C4)=NC=N1
9e	NC1=C2C(N(CCN3CCNCC3)C=C2C4=CC=C(NC(NC5=NOC(C(C)(C)C)=C5)=O)C=C4)=NC=N1
9f	NC1=C2C(N(CCCN3CCOCC3)C=C2C4=CC=C(NC(NC5=NOC(C(C)(C)C)=C5)=O)C=C4)=NC=N1
9g	NC1=C2C(N(CCN(C)C)C=C2C3=CC=C(NC(NC4=NOC(C(C)(C)C)=C4)=O)C=C3)=NC=N1
9h	NC1=C2C(N(C)C=C2C3=CC=C(NC(NC4=NOC(C(C)(C)C)=C4)=O)C=C3)=NC=N1
9i	NC1=C2C(N(CC)C=C2C3=CC=C(NC(NC4=NOC(C(C)(C)C)=C4)=O)C=C3)=NC=N1
9j	NC1=C2C(N(C(C)C)C=C2C3=CC=C(NC(NC4=NOC(C(C)(C)C)=C4)=O)C=C3)=NC=N1
9k	NC1=C2C(N(CCC)C=C2C3=CC=C(NC(NC4=NOC(C(C)(C)C)=C4)=O)C=C3)=NC=N1
9l	NC1=C2C(N(CCCC)C=C2C3=CC=C(NC(NC4=NOC(C(C)(C)C)=C4)=O)C=C3)=NC=N1
9m	NC1=C2C(N(CCCCCC)C=C2C3=CC=C(NC(NC4=NOC(C(C)(C)C)=C4)=O)C=C3)=NC=N1
9n	NC1=C2C(N(C3CCCC3)C=C2C4=CC=C(NC(NC5=NOC(C(C)(C)C)=C5)=O)C=C4)=NC=N1
9o	NC1=C2C(N(CC3=CC=CC=C3)C=C2C4=CC=C(NC(NC5=NOC(C(C)(C)C)=C5)=O)C=C4)=NC=N1
9p	NC1=C2C(N(CCCCO)C=C2C3=CC=C(NC(NC4=NOC(C(C)(C)C)=C4)=O)C=C3)=NC=N1
9q	NC1=C2C(N(C(N(CC)CC)=O)C=C2C3=CC=C(NC(NC4=NOC(C(C)(C)C)=C4)=O)C=C3)=NC=N1
9r	NC1=C2C(N(CCN3CCN(S(=O)(C)=O)CC3)C=C2C4=CC=C(NC(NC5=NOC(C(C)(C)C)=C5)=O)C=C4)=NC=N1
9s	NC1=C2C(N(CCOC)C=C2C3=CC=C(NC(NC4=NOC(C(C)(C)C)=C4)=O)C=C3)=NC=N1
9t	NC1=C2C(N(CCOCC)C=C2C3=CC=C(NC(NC4=NOC(C(C)(C)C)=C4)=O)C=C3)=NC=N1
9u	NC1=C2C(N(CCOCC)C=C2C3=CC=C(NC(NC4=NOC(C(C)(C)C)=C4)=O)C=C3)=NC=N1
9v	NC1=C2C(N(CCC=C)C=C2C3=CC=C(NC(NC4=NOC(C(C)(C)C)=C4)=O)C=C3)=NC=N1
9w	NC1=C2C(N(C/C=C(C)/C)C=C2C3=CC=C(NC(NC4=NOC(C(C)(C)C)=C4)=O)C=C3)=NC=N1
9x	NC1=C2C(N(CC(C)=C)C=C2C3=CC=C(NC(NC4=NOC(C(C)(C)C)=C4)=O)C=C3)=NC=N1
9y	NC1=C2C(N(CCCC=C)C=C2C3=CC=C(NC(NC4=NOC(C(C)(C)C)=C4)=O)C=C3)=NC=N1
9z	NC1=C2C(N(CCCCC=C)C=C2C3=CC=C(NC(NC4=NOC(C(C)(C)C)=C4)=O)C=C3)=NC=N1
9aa	NC1=C2C(N(CC#C)C=C2C3=CC=C(NC(NC4=NOC(C(C)(C)C)=C4)=O)C=C3)=NC=N1
9ab	NC1=C2C(N(CC#CC)C=C2C3=CC=C(NC(NC4=NOC(C(C)(C)C)=C4)=O)C=C3)=NC=N1
9ac	NC1=C2C(N(CC#CCC)C=C2C3=CC=C(NC(NC4=NOC(C(C)(C)C)=C4)=O)C=C3)=NC=N1
9ad	NC1=C2C(N(CC#N)C=C2C3=CC=C(NC(NC4=NOC(C(C)(C)C)=C4)=O)C=C3)=NC=N1
9ae	NC1=C2C(N(CCC#N)C=C2C3=CC=C(NC(NC4=NOC(C(C)(C)C)=C4)=O)C=C3)=NC=N1
13a	NC1=C2C(NC=C2C3=CC=C(NC(NC4=NOC(C(C)(C)C)=C4)=O)C(F)=C3)=NC=N1
13b	NC1=C2C(N(CC=C)C=C2C3=CC=C(NC(NC4=NOC(C(C)(C)C)=C4)=O)C(F)=C3)=NC=N1
13c	NC1=C2C(N(CCC=C)C=C2C3=CC=C(NC(NC4=NOC(C(C)(C)C)=C4)=O)C(F)=C3)=NC=N1
13d	NC1=C2C(N(CC#C)C=C2C3=CC=C(NC(NC4=NOC(C(C)(C)C)=C4)=O)C(F)=C3)=NC=N1
13e	NC1=C2C(N(CCOC)C=C2C3=CC=C(NC(NC4=NOC(C(C)(C)C)=C4)=O)C(F)=C3)=NC=N1
13f	NC1=C2C(N(CCOCC)C=C2C3=CC=C(NC(NC4=NOC(C(C)(C)C)=C4)=O)C(F)=C3)=NC=N1
13g	NC1=C2C(N(CC#N)C=C2C3=CC=C(NC(NC4=NOC(C(C)(C)C)=C4)=O)C(F)=C3)=NC=N1
13h	NC1=C2C(N(CCC#N)C=C2C3=CC=C(NC(NC4=NOC(C(C)(C)C)=C4)=O)C(F)=C3)=NC=N1
